# Supplementary material for: Integrated omics approaches provide strategies for rapid erythromycin yield increase in Saccharopolyspora erythraea
Source: PubMed Central journal article supplement (PMC4891893; doi:10.1186/s12934-016-0496-5), 2016-06-03
Supplement: 12934_2016_496_MOESM8_ESM.pdf [file 12934_2016_496_MOESM8_ESM.pdf]

Additional file 8. 2-D gel analysis

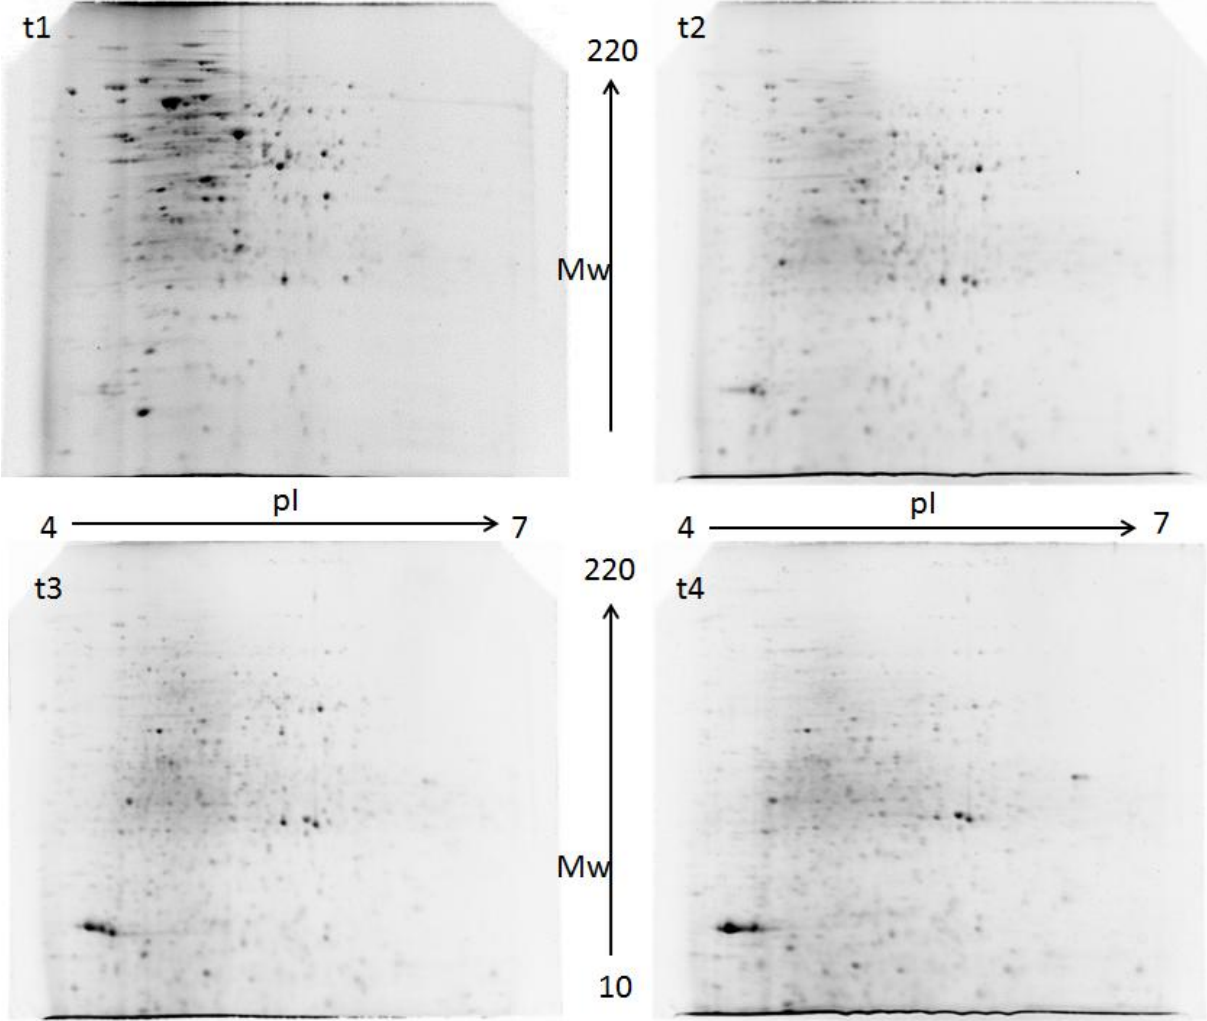

Figure A: Representation of 2-D gels of WT strain in different time points (t1-t4)

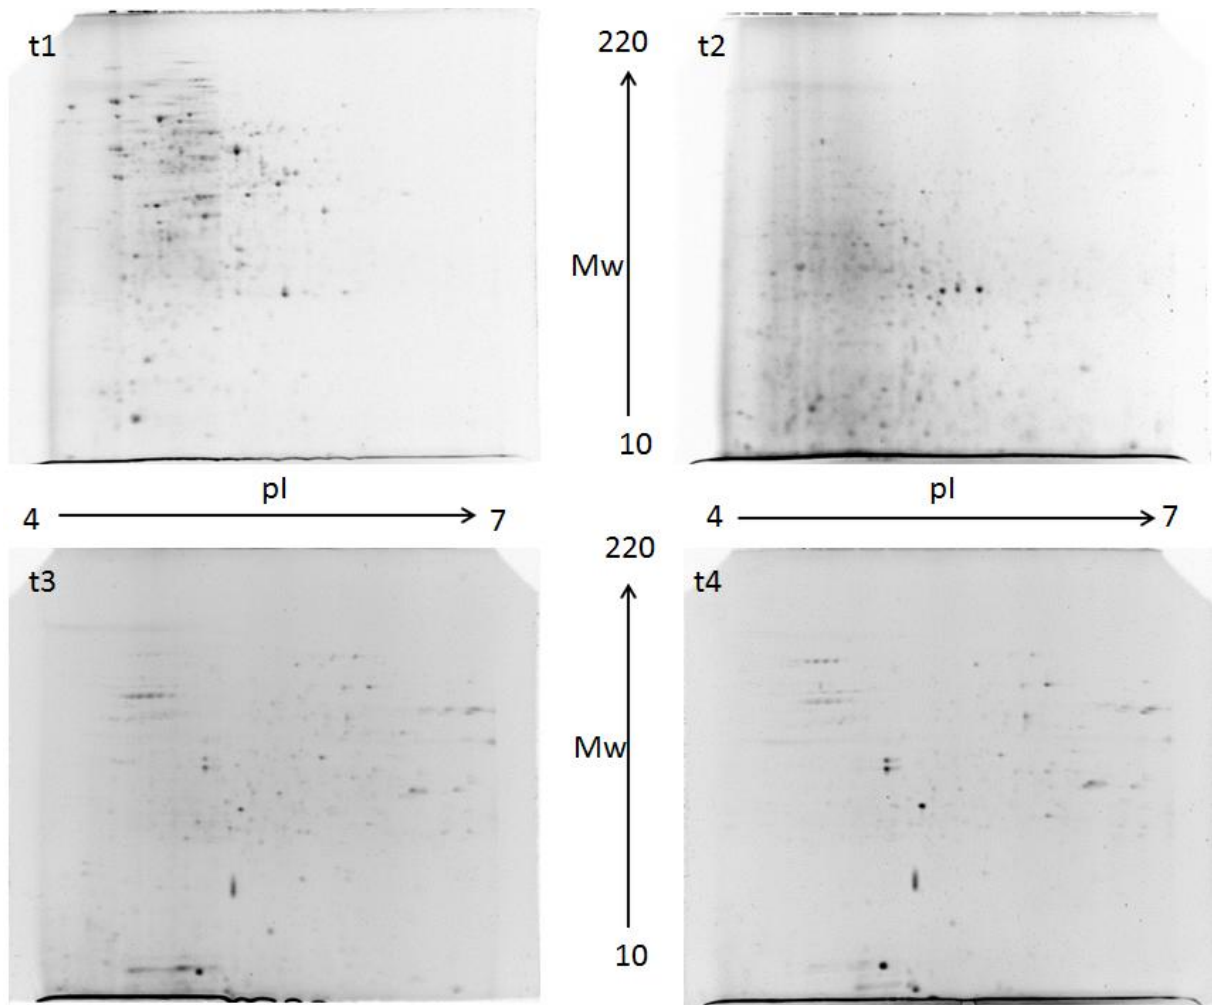

**Figure B:** Representation of 2-D gels of HP strain in different time points (t1-t4)

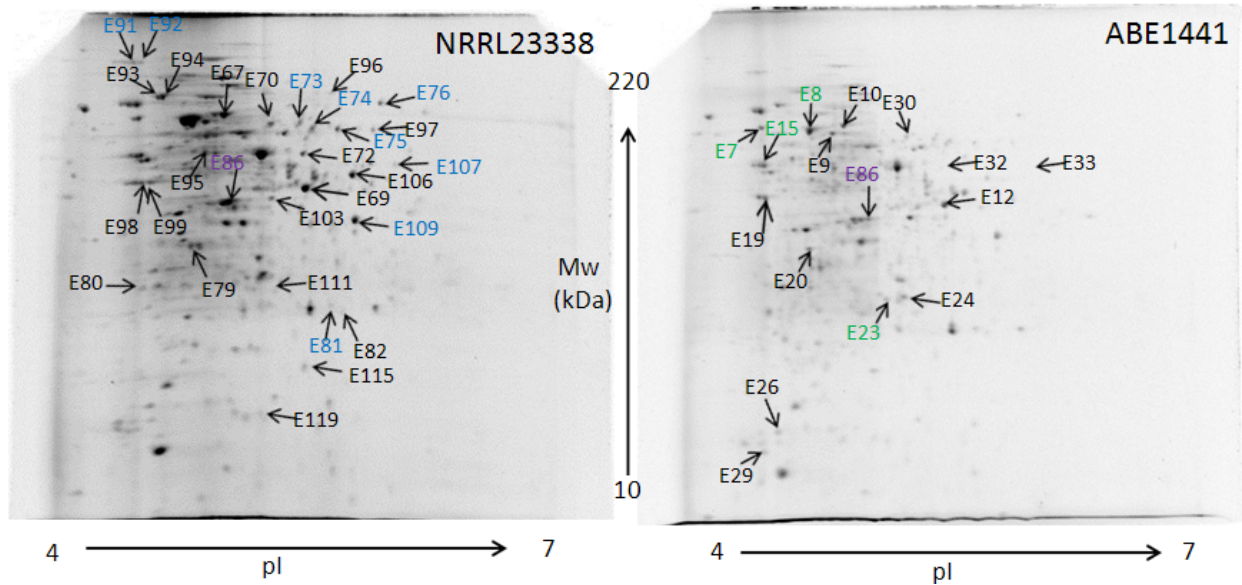

**Figure C: Comparison of 2-D images between HP and WT in t1 (see spot identification in table 1).** Spots marked with blue color mark proteins observed in the WT strain, but not in the HP strain (SACE\_6668, SACE\_1638, SACE\_1740, SACE\_1704, SACE\_0816, SACE\_6708, SACE\_1708, SACE\_6664); spots marked with green color mark proteins observed only in the HP strain, but not in WT strain; spot marked with purple marks ketol-acid reductoisomerase IlvC (SACE\_6157) that was downregulated in the HP strain.

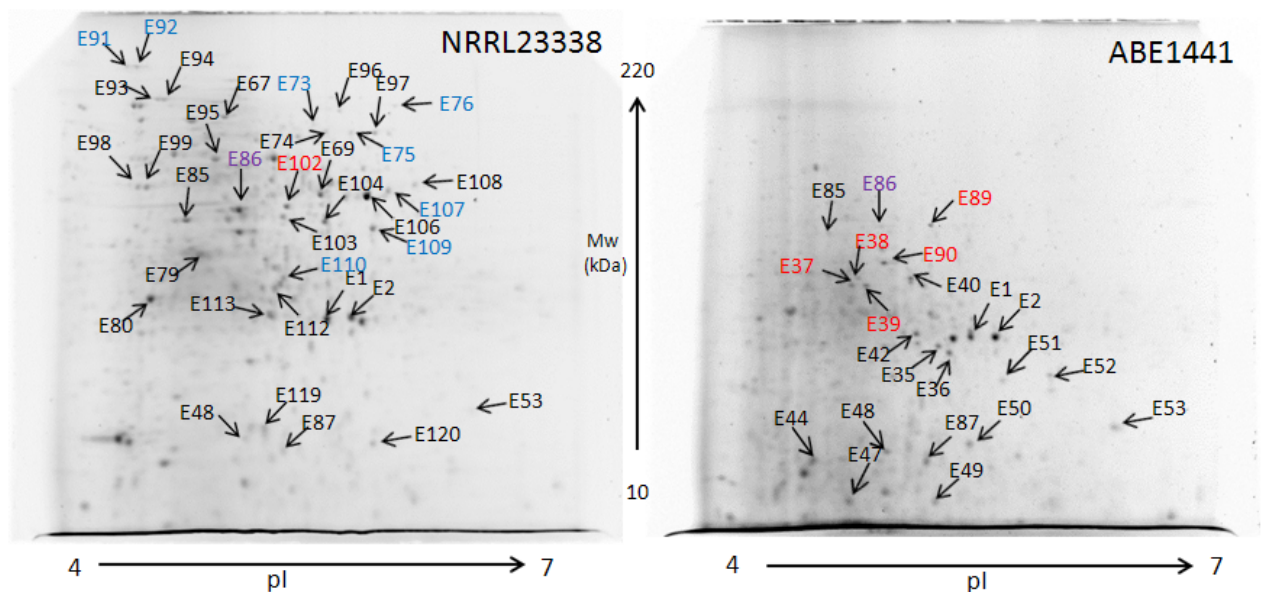

**Figure D: Comparison of 2-D images between HP and WT in t2 (see spot identification in table below).** Spots marked with blue color mark proteins observed in the WT strain, but not in the HP strain (SACE\_6668, SACE\_1638, SACE\_1740, SACE\_1704, SACE\_0816, SACE\_6708, SACE\_1708, SACE\_6664); spots marked with red color mark erythromycin 3"-O-methyltransferase EryG (SACE\_0728) that was found at five different locations in the HP strain but only in one spot in the WT strain; spot marked with purple marks ketol-acid reductoisomerase IlvC (SACE\_6157) that was downregulated in the HP strain.

**Table:** Spot identification

| <b>Spot no.</b>                  | <b>Protein</b>                                                                           |
|----------------------------------|------------------------------------------------------------------------------------------|
| E1                               | superoxide dismutase [Fe-Zn] 1 (SACE_0619)                                               |
| E2                               | putative glycosyltransferase (SACE_2010)                                                 |
| E7, E8                           | glucose-6-phosphate isomerase (SACE_2158)                                                |
| E9, E10, E51                     | D-3-phosphoglycerate dehydrogenase (SACE_6155)                                           |
| E12, E40, E52,<br>E69, E103      | glyceraldehyde 3-phosphate dehydrogenase (SACE_2143)                                     |
| E15                              | enolase/2-phospho-d-glycerate hydro-lyase/2-phosphoglycerate dehydratase (SACE_0838)     |
| E19, E98, E99                    | succinyl-CoA ligase [ADP-forming] subunit (SACE_6669)                                    |
| E20                              | electron transfer flavoprotein subunit alpha (SACE_6196)                                 |
| E23                              | phosphoglycerate mutase (SACE_6967)                                                      |
| E24, E111                        | ATP synthase subunit delta/ATP synthase F(1) sector subunit delta (SACE_6283)            |
| E26                              | putative fructose-specific permease (SACE_2274)                                          |
| E29                              | transcription elongation factor GreA/transcript cleavage factor GreA (SACE_0907)         |
| E30, E70                         | dihydrolipoamide dehydrogenase (SACE_5677)                                               |
| E32                              | isocitrate lyase (SACE_1449)                                                             |
| E33                              | putative L-alanine dehydrogenase (SACE_6380)                                             |
| E35, E36                         | malate dehydrogenase (SACE_3674)                                                         |
| E37, E38, E39,<br>E89, E99, E102 | erythromycin 3''-O-methyltransferase (SACE_0728)                                         |
| E42, E85, E113                   | thiosulfate sulfurtransferase (SACE_7106)                                                |
| E44                              | NAD-dependent epimerase/dehydratase family protein (SACE_0813)                           |
| E47                              | Elongation factor Ts (EF-Ts) (SACE_6037)                                                 |
| E48                              | heat shock protein HSP20 (SACE_0150)                                                     |
| E49                              | ATP synthase subunit alpha/ATP synthase F1 sector subunit alpha (SACE_6282)              |
| E50                              | DNA-directed RNA polymerase subunit beta/RNAP subunit beta (SACE_6853)                   |
| E53                              | Acetyltransferase (SACE_5342)                                                            |
| E67                              | Arginine--tRNA ligase/Arginyl-tRNA synthetase (SACE_6300)                                |
| E72                              | isocitrate lyase (SACE_1449)                                                             |
| E73                              | inosine-5'-monophosphate dehydrogenase (SACE_6708)                                       |
| E74                              | phospho-2-dehydro-3-deoxyheptonate aldolase (SACE_1708)                                  |
| E75                              | phosphoribosylaminoimidazolecarboxamide formyltransferase/IMP cyclohydrolase (SACE_6664) |
| E76                              | phosphogluconate dehydratase (SACE_1740)                                                 |
| E79, E80, E119                   | ATP synthase beta chain (SACE_6280)                                                      |
| E81                              | ribose-phosphate pyrophosphokinase (SACE_0816)                                           |
| E82                              | flavodoxin/nitric oxide synthase (SACE_2881)                                             |
| E86                              | ketol-acid reductoisomerase/acetohydroxy-acid isomeroeductase (SACE_6157)                |
| E87                              | probable fatty acid oxidation complex alpha subunit (SACE_1823)                          |
| E91, E92                         | dihydrolipoamide succinyltransferase (SACE_1638)                                         |
| E93, E94, E95                    | 70 kD heat shock protein (molecular chaperone) (SACE_7210)                               |
| E96                              | delta-1-pyrroline-5-carboxylate dehydrogenase precursor (SACE_1979)                      |
| E97                              | phosphodiesterase/alkaline phosphatase D (SACE_1400)                                     |
| E104, E106, E120                 | oxidoreductase (SACE_0698)                                                               |
| E107                             | 6-phosphofructokinase (SACE_1704)                                                        |
| E108                             | 4-hydroxyphenylpyruvate dioxygenase (SACE_0905)                                          |
| E109, E110                       | succinyl-CoA synthetase alpha chain (SACE_6668)                                          |
| E112                             | phosphate transport system regulator PhoU-related protein (SACE_7091)                    |
| E115                             | plant-type carbonic anhydrase (SACE_0433)                                                |
